# Supplementary material for: Calibration of Mutation Rates Reveals Diverse Subfamily Structure of Galliform CR1 Repeats
Source: PubMed Central journal article supplement — Genome Biol Evol. 2009 May 27;1:119–30. doi: 10.1093/gbe/evp014 (PMC2817409; doi:10.1093/gbe/evp014), 2009-05-27
Supplement: evp014_1.pdf [file evp014_1.pdf]

## Supplemental Material

Table S1. Divergences of 57 newly identified CR1 elements in chicken genome.

| Subfamily | Average Divergence(%) | Standard Deviation | Type |
|-----------|-----------------------|--------------------|------|
| CR1-B     | 3.08                  | 2.20               | Y    |
| CR1-B2    | 6.81                  | 2.90               | Y    |
| CR1-B2_2  | 7.56                  | 1.94               | Y    |
| CR1-C     | 5.83                  | 2.20               | Y    |
| CR1-C_2   | 6.46                  | 1.64               | Y    |
| CR1-C_3   | 6.00                  | 2.43               | Y    |
| CR1-C2    | 7.86                  | 2.05               | Y    |
| CR1-H     | 3.06                  | 1.61               | Y    |
| CR1-H_2   | 2.75                  | 2.73               | Y    |
| CR1-H_3   | 3.16                  | 2.41               | Y    |
| CR1-X     | 5.58                  | 3.31               | Y    |
| CR1-X1    | 5.66                  | 2.01               | Y    |
| CR1-X1_2  | 6.00                  | 2.63               | Y    |
| CR1-X2    | 5.60                  | 2.77               | Y    |
| CR1-X2_2  | 5.44                  | 1.39               | Y    |
| CR1-X2_3  | 6.65                  | 2.71               | Y    |
| CR1-X2_4  | 5.48                  | 1.30               | Y    |
| CR1-Y     | 3.55                  | 1.90               | Y    |
| CR1-C3    | 15.39                 | 2.90               | A    |
| CR1-C3_2  | 12.03                 | 2.36               | A    |
| CR1-C3_3  | 10.09                 | 3.82               | A    |
| CR1-C4    | 15.85                 | 2.67               | A    |
| CR1-C4_2  | 16.99                 | 2.96               | A    |
| CR1-C4_3  | 16.49                 | 3.13               | A    |
| CR1-C4_4  | 18.08                 | 2.90               | A    |
| CR1-C4_5  | 18.49                 | 3.01               | A    |
| CR1-D     | 10.07                 | 2.04               | A    |
| CR1-D_2   | 10.46                 | 2.69               | A    |
| CR1-D_3   | 10.22                 | 2.30               | A    |
| CR1-D2    | 11.41                 | 2.24               | A    |
| CR1-D2_2  | 12.79                 | 2.27               | A    |
| CR1-D2_3  | 12.78                 | 2.47               | A    |
| CR1-E     | 10.85                 | 2.52               | A    |
| CR1-E_2   | 9.60                  | 2.40               | A    |
| CR1-E_3   | 22.62                 | 3.15               | A    |
| CR1-E_4   | 11.46                 | 3.40               | A    |
| CR1-F     | 11.03                 | 3.36               | A    |
| CR1-F2    | 10.21                 | 2.25               | A    |
| CR1-F2_2  | 11.67                 | 3.89               | A    |
| CR1-F2_3  | 12.08                 | 4.49               | A    |

|          |       |      |    |
|----------|-------|------|----|
| CR1-G    | 17.10 | 3.87 | A  |
| CR1-G_2  | 19.67 | 4.17 | A  |
| CR1-G_3  | 22.53 | 4.39 | A  |
| CR1-G_6  | 15.59 | 2.67 | A  |
| CR1-G_7  | 15.77 | 2.50 | A  |
| CR1-X_3  | 15.09 | 4.62 | A  |
| CR1-X_5  | 12.44 | 2.89 | A  |
| CR1-X_6  | 12.72 | 3.08 | A  |
| CR1-X_8  | 13.94 | 4.11 | A  |
| CR1-Y3   | 9.98  | 2.34 | A  |
| CR1-G_4  | 31.93 | 6.91 | AA |
| CR1-G_5  | 27.42 | 7.45 | AA |
| CR1-X_2  | 16.45 | 6.45 | AA |
| CR1-X_4  | 16.65 | 5.15 | AA |
| CR1-X_7  | 21.90 | 5.66 | AA |
| CR1-Y4   | 19.00 | 6.59 | AA |
| CR1-Y4_2 | 27.48 | 7.96 | AA |

After correction for multiple hits and the CpG content, we calculated the mean and standard deviation of the divergence distribution. The mean of 9.0 substitutions from consensus (%) was used as the threshold to define Y (“young”) or A (“ancient”) subfamilies. The standard deviation of 5.0% was used to decide one or two modes. One-mode distributions were labeled as Y or A while two-mode distributions are labeled as AA.

File S2. Fasta files of 57 putative chicken and one turkey-specific CR1 consensus sequences.

>CR1-C4\_2

AACAGTATCCTGGGCTGCATCAAAAGAGGGGTGGCCAGCAGGGAGAGGGAGGTGATTGTCCCCCTCTGCTCTGCCCT  
TGTGAGGCCCATCTGGAGTACTGCATCCAGGCCTGGGGCCCCCAGCACAAAGAAAGATGTGGAGCTGTTGGAGTGGG  
TCCAGAGGAGGGCCACGAAGATGATCAGAGGGCTGGAGCACCTCTCCTATGAAGAAAGGCTGAGGGAGCTGGGCTTG  
TTCAGCCTGGAGAAGAGAAGGCTCCGGGGAGACCTCATTGCAGCCTTCCAGTACTTAAAGGGAGCTTATAAACAGGA  
GGGAGACTGACTTTTTTACATGGTCTGATAGTATAGGACAAGGGGGAATGGTTTTAACTAAAAGAGGGGAGATTTA  
GGTTAGATGTTAGGAAGAAATTCTTTACTCAGAGGGTGGTGGGCACTGGCACAGGCTGCCAGAGAAGCTGTGGAT  
GCC

>CR1-X\_2

AATGGCATCCTGGCTTGTATCAGAAATAGTGTGGCCAGCAGGAGCAGGGAAGTATCATCCCTCTGTACTCAGCACT  
GGTGAGGCCCGCACCTTGAGTACTGTGTTTCAGTTTTGGGCCCTCACTACAAGAAAGACATTGAGGCCCTGGAGCGTG  
TCCAGAGAAGGGCAACAAAGCTGGTGAGGGGTCTGGAGCACAAAGTCTTATGAGGAGCGGCTGAGGGAACCTGGGATTG  
TTTAGTCTGGAGAAGAGGAGGCTCAGGGGAGACCTTATTGCTCTCTACAACCTACCTGAAAGGAGGTTGTGGTGGGT  
GGGGGTGAGCCTCTTCTCCCATGTAAGTATAGTATAGGACTAGAGGGAATGGCCTCAAGTTGCACCAGGGGAGATTCA  
GGTTGGATATTAGGAAAAATTTCTTCTCTGAAAGAGTGGTTCAGGCACTGGAATGGGCTGCCAGGGAGGTGGTGGAG  
TCA

>CR1-G\_2

AATGGTATCCTGGGGTGCATTA AAAAGAGTGTGGCCAGCAGGTTCGAGGGAGGTGATCCTCCCCCTCTACTCTGCCCT  
GGTGAGGCCACATCTGGAGTACTGTGTCCAGTTCTGGGCTCCTCAGTTCAAGAAAGACAGGGAACCTGCTAGAGAGAG  
TCCAGCGGAGGGCCACAAAGATGATTAGGGCCTGGAGCATCTCCCTTATGAGGAAAGGCTGAGAGACCTGGGTCTG  
TTCAGCCTGGAGAAGAGAAGACTGAGAGGGGATCTTATCAATGTTTATAAATATCTAAAGGGTGGGTGTCAAGAGGA  
TGGGGCCAGGCTCTTTTCAGTGGTGGCCAGTGACAGGACAAGGGGCAATGGGCACAAACTGGAACATAGGAAGTTCC  
ATACAAATATGAGAAAAAATTTCTTTACTGTGAGGGTGGACAGGCACTGGAACAGGCTGCCAGAGAGGTTGTGGAG  
TCT

>CR1-C

AAGTGTGTTCTGGGCTGCATTA AAAAAGGGGTGGCCAGCAGGGAGAGGGAGGTGATTGTCCCCCTCTACTCAGCTCT  
TGTGAGGCCCATCTGGAGTACTGCGTCCAGGCCTGGGGCCCCCAGTACAGGAAGGACGTGGAGCTCTTGAGCGGG  
TCCAGAGGAGGGCCACTAAGATGATCAGAGGGCTGGAGCACCTCTCCTATGAGGAAAGGTTGAGGGAACCTGGGCTTG  
TTTAGCTTGGAGAAGAGAAGGCTCCGGGGAGACCTCATTGTGGCCTTCCAGTACTTGAAGGGAGCATATAAACAGGA  
GGGGGAACGGCTGTTTACGAGGGTGGATAGTATAGGACAAGGGGGAATGGTTTTAACTGAGACAGGGGAGGTTTA  
GGTTAGATATTAGGAGGAAGTTTTTACACAGAGGGTGGTGGACACTGGAACAGGTTGCCAAGGAGGTTGTGGAT  
GCC

>CR1-X2\_2

AATGGCATCCTGGCTTGTATCAGGAATGGTGTGGTGGAGCAGGACTAGGGAAGTATCCTGCCCTGTACTCGGCATT  
GGTGAGGCCCTCACCTCGAGTACTGTGTTTCAGTTTTGGGCACCTCAGTACAGAAAGGACATGGAGGTGCTGGAGCAGG  
TCCAAAGAAGGGCAACAAGGCTTGTGAAGGGCTTGGAGAATATGCCCTATGAGGAGAGACTGAAGGAACCTGGGGCTG  
TTTAGTCTGGGGAAAAGGAGGCTGAGGGGAGACCTTATTGCTCTCTTCCAATATCTGAAAGGTGCTTACAGCGAGAG  
CGGGGTTGGTCTCTTCTCACTGGTGGACAGGTGGACAGGACGAGGGGAAATGGCCTCAAGTTGCGCCAGGGTAAGTTTA  
GGTTGGATATCAGGAAAAATTTCTTTACAGAAAGGGTTGTTAAGCACTGGAATAGGCTCCCCAGGGAGGTGGTTGAG  
TCA

>CR1-H\_2

AATGGCATCCTGGCTTGTATCAGAAATAGTGTGGCCAGCAGGAACAGGGAAGTAATTATCCCCCTGTACTCAGCACT  
GGTGAGGCCCGCACCTCGAGTACTGTGTCCAGTTTTGGGCCCTCACTGTAAGAAAGACATCGAGGCCCTGGAGCGTG  
TCCAGAGGAGGGCAACAAAGCTGGTGAGGGGTCTGGAGCACAGGCCTTATGAAGAGCGGCTGAAGGAGCTGGGATTG  
TTCAGTCTAGAGAAGAGGAGGCTCAGGGGAGACCTTATTGCTCTCTATAACTACCTGAAGGGAGGTTGTAGTGGCT  
GGGGGTGAGCCTCTTCTCTCGTGTGACTAGTATAGGACTAGAGGGAATGGCTTCAAGCTGCGCCAGGGAAGATTCA  
GGCTGGACGTTAGGAAATACTACTTCTCTGAAAGGGTGGTTCAGGCACTGGAATGGGCTGCCAGAGAGGTGGTGGAG  
TCA

>CR1-D2

AACCGTATCCTGGGCTGCATCAAAAGAAGCGTGGCCAGCAGGGCGAGGGAGGTGATCCTGCCCTCTGCTCTGCGCT  
GGTGAGACCTCACCTGGAGTACTGCATCCAGATGTGGAGTCTCAGTACAGGAGAGACATGGACCTGTTGGAGCGCA  
TCCAGAGGAGGGCCACAAAAATGATCCAAGGGATGGAACACCTCTCCTATGAGGACAGGCTGAGAGAGCTGGGGCTG  
TTCAGCCTGGAGAAGAGAAGGCTCTGGGGAGACCTGAGAGCGGCCTTTTCAGTATCTAAAGGGGGCTATAAGAAAGA  
AGGGGACAGACTCTTTAGCAGGGTCTGTTGTGATAGGACAAGGGGAAATGGTTTTCAAATAAAAAGAGGGGAGATTTA

GATTGGATATAAGGAAGAAGTTTTTTTACAATAAGGGTGGTGAGGCACTGGAACAGGTTGCCAGAGAGGTGGTGGAT  
GCC

>CR1-B2

AATGGTATCCTGGGCTCCATCAGAAGAGGGGTGGCCAGCAGGGACAGGGAGGTGATTGTCCCTCTCTACTCTGCCCT  
TGTGAGGCCCCATCTGGAGTACTGTGTCCAGGTCTGGAGCCCCCAGTACAAGAAAGACAGAGAGCTGTTGGAGAGGG  
TCCAGAGGAGGGCCACAAAGATGATCAGAGGGCTGGAGCACCTCCCCTACGAAGACAGGCTGAGGGAGCTGGGCTTG  
TTCAGCCTGGAGAAAAGAAGGCTGCGGGGTGACCTCATTGCAGCCTTTTCAGTACCTAAAGGGAGCCTATAAACAGGA  
GGGGAGTCAACTCTTTGAAAGGGTAGATAACAGCAGGACAAGGGGAAATGGTTTTAAGTTGAAGGAGGGGAAGATTTA  
GGTTGGATGTGAGGGGGAAGTTCTTTACTATGAGAGTGGTGAGGTGCTGGAACAGGCTGCCAGAGAGGTTGTGGAT  
GCC

>CR1-E\_2

AACCGTATCCTGGGTTGCATCAAGAGAAGTGTGACCAGCAGGTGAGGGAGGTGATTCTGCCCTCTACTCTGCTCT  
CGTGAGACCCACCTGGAGTACTGCATCCAGTTCTGGAGCCCCAACACAAGAAGGACATGGAGCTGTTGGAGCAGG  
TCCAGAGGAGGGCCACGAAGATGATCAGAGGGCTGGAGCACCTCCCCTATGAGGACAGGCTGAGAGAGCTGGGGCTC  
TTCAGCCTGGAGAAGAGAAGGCTCCGAGGAGACCTTATAGCGGCCTTCCAGTACCTGAAGGGGGCCTACAGGAAAGC  
TGGGGAGGGACTTTTTATAAGGGCATGTAGCGACAGGATGAGGGGAAATGGTTTTAACTGGAAGAGGGTAGATTTA  
GACTAGATATTAGGAAGAAATTTCTTTACTGTGAGGGTGGTGAGACACTGGAACAGGTTGCCAGTGAGGTTGTGGAT  
GCC

>CR1-X1

AATGCCATCCTGGCCTGCATTAGAAATAGTGTGGCCAGCAGGAGCAGGGAGGTAATCATCCCCCTGTACTCAGCACT  
GGTGAGGCCGCACCTCGAGTACTGTGTTTCAGTTTTGGGCCCCCTACTACAAGAAAGACATTGAGGCCCTGGAACGTG  
TCCAGAGAAGGGCAACAAAACCTGGTGAGGGGTCTGGAGCACAAGTCTTATGAGGAGCGGCTGAGGGAGCTGGGATTG  
TTTAGTCTGGAGAAGAGGAGGCTCAGGGGAGACCTCATTGCACCTCTACAACCTTCTGAAGGGAGGTTGTGATGAGGA  
GGGGTTTTGGCCTCTTCTCCCAGGCAACAAAACAGGACCCGAGGAAATGGCCACAAGTTGTACCAGAGGAGGTTTAGAT  
TAGACATAAGGAAAAACTTTTTCTCTCAGAGAGTGGTCAGGCACTGGAATGGCCTGCCAGGGAGGTGGTGGAGTTG

>CR1-F2

AATGGTATCCTGGGGTGCATTA AAAAGAGCGTGGCCAGCAGGTGAGGGAGGTGATCCTCCCCCTCTACTCTGCCCT  
GGTGAGGCCACATTTAGACTACTGTGTCCAGTTCTGGGCTCCCCAGTTCAAAAAGACAGGGATCTCCTAGAAGGAG  
TCCAGCGGAGGGCCACAAAGATGATAAAGGGCCTGGAGCATCTCCATATGAGGAAAGGCTGAGTAACCTGGGTCTG  
TTCAGCCTGGGAAAAGAAGACTGAGAGGGGATCTGATAAATGTTTTATAAATATCTAAAGGGAGGTGGGAGGCAAA  
GGATGAGGCCAGGCTCTTCTCGGTGGTGTGTAGCGATAGGACAAGGAGTAATGGCCTAAAACCTGAAACATAGGAAGT  
TCCATACTAACATGCGGAAGA AACTTTCTTTATGGTAAGGGTGTGAGGCACTGGAACAGGTTGCCAGAGAGGTTGTG  
GAGTCT

>CR1-Y

AATGGCATCCTGGCTTGTATCAGGAATGGTGTGGTGAGCAGGACTAGGGAAGTCATCCTGCCCTGTACTCGGCATT  
GGTGAGGCCTCACCTCGAGTACTGTGTTTCAGTTTTGGGCACCTCAGTACAAGAAGGACATGGAGGTACTGGAGCAGG  
TCCAGAGAAGGGCAACGAGGCTAGTGAAGGGCTTGGAAAATCAGCCCTATGAGGAGAGGCTGAGGGAGCTGGGGCTG  
TTTAGTCTGGGGAAGAGGAGGCTGAGGGGAGACCTTATTACTCTCTTCCAGTACCTGAAAGGTGTTTACAGTGAGAG  
CGGGGTAGGTCTCTTCTCACTGGTGACAGGTGACAAGACGAGGGGAAATGGCCTCAAGTTGCGCCAAGGTAAGTTTA  
GGTTGGACGTTAGGAAACACTTCTTTACAGAAAGGGTGGTTAAACACTGGAATAGGCTCCCCAGGGAGGTGGTTGAG  
TCA

>CR1-B

AATGGTATCCTGGGCTCCATCATGAGAGGGGTGGCCAGCAGGGACAGGGAGGTGATTGTCCCTCTCTACTCTGCTCT  
TGTGAGGCCCCATCTGGAGTACTGTGTCCAGGTATGGAGCCCCCAGTACAAGAAAGACAGAGAGCTGTTGGAGAGGG  
TCCAGAGGAGGGCCACAAAGATGATCAGGGGGCTGGAGCACCTCCCCTACGAGGACAGGCTGAGGGAGCTGGGCTTA  
TTCAGCCTGGAGAAGAGAAGGCTGCGGGGTGACCTCATTGCAGCCTTTTCAGTACCTGAAGGGAGCCTATAAACAGGA  
AGGGAGTAAACTCTTTGAAAGGGTAGATAACAGCAGGACAAGGGGGAACGGTTTTTAAGTTGAAAGAGGGGAAGATTTA  
GGTTGGATGTTAGGGGGAAGTTCTTTACCAGGAGAGTGGTGAGGTGCTGGAACGGGCTGCCAGAGAGGTTGTGGAT  
GC

>CR1-Y4

AACTGTACCCTGGGGTGCATCAGGCCAGCACTGCCAGCTGGTCAAGGGAAGGGATTGTCCCCTCTGCTCTGCACT  
GGTGCGGCCTCACCTCGAGCACTGTGTGCAGTTTTGGGTGCCACAATATAAGAAGGACATAAAACTATTAGAGAGTA  
TCCAAAGGAGGGCTACAAAGATGGTGAAGGGTCTAGAGGGCAAGATGTATGAGGAGTGGCTGAGGTCCCTTGGTTTTG  
TTCAGCCCAGAGCAGAGGAGGCTGAGGGGAGGCCTCATGGCGCCTGCAGCTCCTCACAGGGAGCGGAGGGGCAGCG  
CTGAGCTCTGCTCTCTGGTGACAGCGACAGGACCCGAGGGAACGGCATGGAGCTGTGTGAGGGGAGGGTCAGGTTGG  
GTGTTAGGAAAAGGTTCTTACCAGAGGGTGGTGGGCACTGGAACAGGCTCCCCAGGGCAGTGGTCAAGGCC

>CR1-F

AATGGGATCCTGGGGTGCATTAAGAGGAGCGTGGCCAGCAGGTCAAGGGAGGTGATCCTCCCCCTCTACTCTGCCCT  
GGTCAGGCCTCACCTGGAGTACTGTATCCAGTTCTGGGCTCCCCAGTACAAAAAGACAGGGATCTCCTGGAGAGAG  
TCCAGCGGAGGGCCACAAAGATGATAAAGGGCCTGGAGCATCTCCCCTATGAGGAAAGGCTGAGTGACCTGGGTCTG  
TTCAGCCTTGAGAAAAGAAGACTCAGAGGGGATCTGATTAATGTTTATAAATATCTTAAGTGTGGGAGTCAAAGGGA  
CATGGCCAACCTCTTTTTCAGTGGTCTGTGGGGACAGGACAAGGGGAAATGGCCATAAACTGGAGCATAGGAAGTTCT  
GCACCAATATGCGAAGGAACCTTCTTTCACAGTGAGGGTGACGGAGCACTGGAACAGGCTGCCAGGGAGGTTGTGGAT  
TCT

>CR1-D\_2

AACCGTATCCTGGGCTGCATCAAAGAAGCATGGCCAGCAGGTGAGGGAGGTGATCCTGCCCTCTACTCTGCGCT  
GGTGAGGCCTCACCTGGAGTACTGCATCCAGATGTGGAGTCTCAGTACAGGAGAGACATAGACCTGTTGGAGCGCA  
TCCAGAGGAGGGCCACAAAAATGATCCAAGGGATGGAACACCTCTCCTATGAGGACAGGCTGAGAGAGCTGGGGCTG  
TTCAGCCTGGAGAAGAGAAGGCTCCGAGGTGACCTGATAGCGGCCTTTTCAGTATCTAAAGGGGAGCTACAGGAAAGA  
AGGGGACAGACTCTTTTAGCAGGGTCTGTGGTGATAGAACAAGGGGAAATGGTTTTCAAGCTTAAAGAGGGTAGATTTA  
GGTTAGATATAAGGAAAAGTCTTTTACAGTGAGGGTGGTGAGGCACTGGAACAGGTTGCCAGAGATGTGGTTGAT  
GCC

>CR1-C3

AAGTATCCTGGGCTGCATCAGAAGAGGGGTGGCCAGCAGGGAGAGGGAGGTGATTGTCCCTCTCTACTCTGCCCTTG  
TGAGGCCCCATCTGGAGTACTGCATCCAGGTCTGGGGCCCCAACACAGGAAAGATGTGGAGCTTTTGGAGAGGGTC  
CAGAGGAGGGCCACGAAGATGATCAGAGGGCTGGAGCACCTCTCCTATGAAGACAGGCTGAGGGAGCTGGGCTTGTT  
CAGTCTGGAGAAGAGAAGGCTGCGGGGAGACCTCATTGCAGCCTTCCAGTATTTAAAGGGAGATTATAAACAGGAGG  
GAAATCAACTTTTTACATGGGTAGATAGTGATAGGACAAGGGGGAATGGTTTTAACTAAAGGAGGGGAGATTTAGA  
TTAGATGTGAGGGGGAAGTTTTTCACTGAGAGGGTGGTGAGGTGCTGGAACAGGCTGCCAGAGAGGTTGTGGATGC  
C

>CR1-C3\_2

AATGGTATCCTGGGTTCCATCAGAAGAGGGGTGGCCAGCAGGGCGAGGGAGGTGATTGTCCCCCTCTATTCTGCCCT  
CGTGAGGCCCCAGCTGGAGTACTGCATCCAAGTCTGGGGCCCCAACACAGGAAAGATGTGGAGCTTTTGGAGAGGG  
TCCAGAGGAGGGCCACGAAGATGATCCAAGGGCTGGAGCACCTCTCCTATGAAGACAGGCTGAAGGAACTGGGCTTG  
TTCAGCCTGGAAAAGAGAAGGCTGTGGGGAGACCTCATTGTGGCCTTCCAATATTTAAAGGGAGTTTATAAACATGA  
GGGAAATCAACTTTTTACATGGGTAGATAGTGATAGGACAAGGGGGAATGGTTTTAACTAAAGGAGGGGAGATTTA  
GATTAGATGTGAGGGGGAAGTTTTTACTGAGAGAGTGGTGAGGTGCTGGAACAGGTTGCCAGAGAGGTTGTGGAT  
GCC

>CR1-G\_3

AATGGTATCCTGGGCTGCATTAGGCAAAGTATTGCCAGCAGGTCAAGGGAGGTGATCCTTCCCCCTCTACTCAGCACT  
GGTGAGGCCACACCTGGAGTACTGTGTCCAGTTCTGGGCTCCCCAGTACAAGAGAGACATGGACATACTGGAGAGAG  
TCCAGCAAAGGGCCACCAAGATGATGAAGGGACTGGAGCACCTCTCCTATGAGGAGAGGCTGAGAGAGCTGGGACTG  
TTCAGCCTGGAGAAGAGGAGGCTCAGGGGGGATCTCATCAATGTCTATAAATACCTGAAGGGAGGGTGCAAAGAGGA  
TGGAGCCAGGCTCTTTTTCAGTGGTGCCAGTGCCAGGACAAGAGGCAATGGGCACAACTGGAACACAGGAGGTTCC  
CTCTGAACATCAGGAAGCACTTCTGTGCTGTGCAGGTGATGGAGCACTGGCACAGGTTGCCAGAGAGGCTGTGGAG  
TCT

>CR1-X\_3

AATGGCATCCTGGCTTGTATCAGAAATAGTGCAGCCAGCAGGAGCAGGGAGGTGATCGTCCCTCTGTACTCAGCACT  
GGTGAGGCTGCACCTCGAGTACTGTGTTTCAGTTTTGGGCCCCCTCACTACAAGAAAGACATTGAGGCCCTGGAGCGTG  
TCCAGAGAAGGGCAACGAAGCTGTGAGGGGTCTGGAGCACAAGTCTTATGGGGAGCAGCTGAGGGAACTGGGATTGT  
TCAGTCTGGAGAAGAGGAGGCTCAGGGGAGACCTTATTGCTCTCTACAACCTGAAAGGAGGTTGTGGTGAGGTG  
GGGGTTGGCCTCTTCTCCCAGGTAACAGTGATAGGATGAGAGGTAATGGCCTCAAGTTGCACCAGGGGAGGTTCCAGG  
TTGGATATTAGGAAAAATTTCTTCTCAGAAAGAGTGGTGAGGCATTGGAACAGGCTGCCAGGGAGGTTGGTGAGTC  
A

>CR1-G

AATGGTATCCTGGGGTGCATTAAGAGGAGCGTGGCCAGCAGGTGAGGGAGGTGATCCTCCCCCTCTACTCTGCCCT  
GGTGAGGCCACATCTGGAGTACTGTGTCCAGTTCTGGGCTCCCCAGTTCAAGAAAGACAGGGAACCTTCTAGAGAGAG  
TCCAGTGGAGGGCCACAAAGATGATTAGGGGCCTGGAGCATCTCCCTTATGAGGAAAGGCTGAGAGACCTGGGACTG  
TTCAGCCTGGAGAAGAGAAGGCTGAGAGGGGATCTTATCAATGCTTATAAATATCTAAAGGGTGGGAGTCAAGTGGA  
TGGGGCCAGGCTCTTTTTCAGTGGTGCCAGCAACAGGACAAGGGGCAATGGGCACAACTGGAACACAGGAAGTTCC  
ATATGAACATGAGGAAGAACCTTCTTTACTGTGAGGGTGACAGAGCACTGGAACAGGCTGCCAGAGAGGTTGTGGAG  
TCT

>CR1-G\_4

AGTATCCTGGGCTGCATTAGGAAAAGTATTGCCAGCAGGTCAAGGGAGGTGATCCTTCCCCTCTACTCAGCACTGGT  
GAGGCCACACCTGGAGTACTGTGTCCAGTTCTGGGCTCCCCAGTACAAGAGAGACATGGACATACTGGAGAGAGTCC  
AGTGAAGGGCCACAAAGATGATTAAGGGACTGGAGCATCTCTCCTATGAGGAAAGGCTGAGAGAGCTGGGACTGTTC  
AGCCTGGAGAAGAGAAGGCTCAGGGGAGATCTTATCAATGTGTATAAAATACCTGAAGGGAGGGTGTAAAGAAGATGG  
AGCCAGACTCTTTTTCAGTGGTGCCAGTGACAGGACAAGAGGCAATGGGCACAAACTGAAACACAGGAGATTCCATC  
TAAACATCAGGAAAAACTTTTTTACTGTGAGGGTATTGAGCACTGGAACAGGTTGCCAGAGAGGTTGTGGAGTCT  
>CR1-G\_5

AAGTATCCTGGGCTGCATTAGGAAAAGTATTGCCAGCAGGTCAAGGGAGGTGATCCTTCCCCTCTACTCAGCACTGG  
TGAGGCCACACCTGGAGTACTGTGTCCAGTTCTGGGCTCCCCAGTACAAGAGAGACATGGACATACTGGAGAGAGTC  
CAGTAAAGGGCCACAAAGATGATGAAGGGACTGGAGCATCTCTCCTATGAGGAAAGGCTGAGAGAGCTGGGACTGTT  
CAGCCTGGAGAAGAGAAGGCTCAGGGGAGATCTTATCAATGTATATAAAATACCTGAAGGGAGGGTGTAAAGAAGATG  
GAGCCAGGCTCTTTTTCAGTGGTGCCAGTGACAGGACAAGAGGCAATGGGCACAAACTGAAACACAGGAGGTTCCAT  
CTGAACATCAGGAAAAACTTCTTTACTGTGAGGGTATTGAGCACTGGCACAGGTTGCCAGAGAGGTTGTGGAGTCT  
T

>CR1-G\_6

AATGGTATCCTGGGGTGCATTAAAAAGAGCGTGGCCAGCAGGTGAGGGAGGTGATCCTCCCCCTCTACTCTGCCCT  
GGTGAGGCCACATCTGGAGTACTGTGTCCAGTTCTGGGCTCCTCAGTTCAAGAAAGACAGGGAACCTTCTAGAGAGAG  
TCCAGCGGAGGGCCACAAAGATGATTAGGGGCTGGAGCATCTCCCTTATGAGGAAAGGCTGAGAGACCTGGGACTG  
TTCAGCCTGGAGAAGAGAAGACTGAGAGGGGATCTTATCAATGCTTATAAAATATCTAAAGGGTGGGAGTCAAGTGG  
TGAGGCCAGGCTCTTTTTCAGTGGTGCCAGTGACAGAACAAGGGGCAATGGGCACAAACTGGAACACAGGAAGTTCC  
ATACAAACATGAGGAAGAAGTCTTTACTGTGAGGGTATTGAGCACTGGAACAGGCTGCCAGAGAGGTTGTGGAG  
TCT

>CR1-G\_7

AATGGTATCCTGGGGTGCATTAAAAAGAGTGTGGCCAGCAGGTGAGGGAGGTGATCCTCCCCCTCTACTCTGCCCT  
GGTGAGGCCACATCTGGAGTACTGTGTCCAGTTCTGGGCTCCTCAGTTCAAGAAAGACAGGGAACCTTCTAGAGAGAG  
TCCAGCGGAGGGCCACAAAGATGATTAGGGGCTGGAGCATCTCCCTTATGAGGAAAGGCTGAGAGACCTGGGACTG  
TTCAGCCTGGAGAAGAGAAGACTGAGAGGGGATCTTATCAATGCTTATAAAATATCTAAAGGGTGGGAGTCAAGTGG  
TGAGGCCAGGCTCTTTTTCAGTGGTGCCAGTGACAGAACAAGGGGCAATGGGCACAAACTGGAACACAGGAAGTTCC  
ATATGAACATGAGGAAAAACTTCTTTACTTTGAGGGTATTGAGCACTGGAACAGGCTGCCAGAGAGGTTGTGGAG  
TCT

>CR1-C3\_3

AATGGTATCCTGGGCTCCATCAGAAGAGGGGTGGCCAGCAGGGACAGGGAGGTGATTGTCCCTCTCTACTCTGCCCT  
CGTGAGGCCCCATCTGGAGTACTGCATCCAGGTCTGGGGCCCCCAGTACAGGAAAGATGTGGAGCTGTTGGAGAGGG  
TCCAGAGGAGGGCCACAAAGATGATCAGAGGGCTGGAGCACCTCCCCTATGAAGACAGGCTGAGGGAGCTGGGCTTG  
TTCAGCCTGGAGAAGAGAAGGCTGCGAGGAGACCTCATTGCAGCCTTCCAGTATTTAAAAGGGGATTATAAACAGGA  
GGGGAATCAACTTTTTTACAAGGGTAGATAGTGATAGGACAAGGGGGAATGGTTTTAAGCTCAAGGAGGGGAAGTTTA  
GATTGGATGTGAGGGGGAAGTTCTTTACAGAGAGAGTGGTGGAGTGTGGAACAGGCTGCCAGAGAGGCTGTGGAT  
GC

>CR1-B2\_2

AATGGTATCCTGGGCTCCATCAGAAGAGGGGTGGCCAGCAGGGACAGGGAGGTGATTGTCCCTCTCTACTCTGCCCT  
CGTGAGGCCCCATCTGGAGTACTGCGTCCAGGTCTGGGGCCCCCAATACAAGAAAGACAGGGAGCTGTTGGAGAGGG  
TCCAGAGGAGGGCCACAAAGATGATCAGAGGGCTGGAGCACCTCCCCTACAAGACAGGCTGAGGGAGCTGGGCTTG  
TTCAGCCTGGAGAAGAGAAGGCTGCGGGGTGACCTCATTGCAGCCTTCCAGTACCTAAAGGGAGCCTACAACAGGA  
GGGGAGTCAACTCTTTGAAAGGGTAGATAATAGCAGGACAAGGGGAAATGGTTTTAAGTTGAAGGAGGGGAAGTTTA  
GGTTGGATGTGAGGGGGAAGTTCTTTACTAAGAGAGTGGTGGAGTGTGGAACAGGCTGCCAGAGAGGCTGTGGAT  
GCC

>CR1-E

AACTGTATCCTGGGTTGCATCAAGAGAAGTGTGACCAGCAGGTGAGGGAGGTGATTCTGCCCTCTACTCTGCTCT  
CGTGAGACCCACCTGGAGTACTGCATCCAGTTCTGGGGCCCCCAACACAAGAAGGACATGGAGCTGTTGGAGCAGG  
TCCAGAGGAGGGCCACGAAGATGATCAGAGGGCTGGAGCACCTCCCCTATGAGGACAGGCTGAGAGAGCTGGGGCTC  
TTCAGCCTGGAGAAGAGAAGGCTCCGGGGGACCTTATAGCGGCCTTCCAGTACCTGAAGGGGGCTACAGGAAAGC  
TGAGGGAGGACTTTTTTATAAGGGCATGTAGTGACAGGATAAGGGGAAATGGCTTTAAACTGGAAGAGGGTAGATTTA  
GACTAGATATTAGGAAGAAATCTTTACTGTGAGGGTGGTGGAGACTGGAACAGGTTGCCAGAGAGGTTGTGGAT  
GCC

>CR1-E\_3

AACCGTATCCTGGGCTGCATCAAAGAAGTGTGGCCAGCAGGTCAAGGGAGGTGATTCTCCCCCTCTACTCTGCTCT  
CATGAGACCCACCTGGAGTACTGCATTGAGTCTGGGGCCCCCAGCATAAGAAGGACATGGACCTGTTGGAGCAGG

TCCAGAGGAGGGCCACAAAGATGATCAGAGGGCTGGAGCACCTCTCCTATGAAGACAGGCTGAGAGAGTTGGGGTTG  
TTCAGCCTGGAGAAGAGAAGGCTCCAGGGAGACCTTATAGCAGCCTTCCAGTACCTAAAGGGGGCCTACAGGAAAGA  
TGGGGAGGGACTTTTTATCAGGGAGTGTAGTGATAGGACAAGGGGTAATGGTTTTAACTAAAAGAGGGTAGATTTA  
GATTAGATATTAGGAAGAAATTTCTTTACTATGAGGGTGGTGAGGCACTGGAACAGGTTGCCAGAGAAGCTGTGGAT  
GCC

>CR1-E\_4

AACTGTATCCTGGGTTGCATCAAGAGAAGTGTGACCAGCAGGTCAAGGGAGGTGATTCTGCCCTCTACTCTGCTCT  
CGTGAGACCCACCTGGAGTACTGCATCCAGTTCTGGGGCCCCAACACAAGAAGGACATGGAGCTGTTGGAGCAGG  
TCCAGAGGAGGGCCACGAAGATGATCAGAGGGCTGGAGCACCTCCCCTATGAGGACAGGCTGAGAGAGCTGGGGCTC  
TTCAGCCTGGAGAAGAGAAGGCTCTGAGGAGACCTTATAGCGGCCTTCCAGTACCTGAAGGGGGCCTACAGGAAAGC  
TGGGGAGGGACTTTTTATAAGGGCATGTAGTGACAGGACAAGGGGAAATGGCTTTAACTGGAAGAGGGTAGATTTA  
GACTAGATATTAGGAAGAAATTTCTTTACTGTGAGGGTGGTGAGACACTGGAACAGGTTGCCAGAGAAGGTTGTGGAT  
GCC

>CR1-D\_3

AACTGTATCCTGGGCTGCATCAAAAAGAAGCGTGGCCAGCAGGGCGAGGGAGGTGATCCTGCCCTCTGCTCTGCGCT  
GGTGAGGCCTCACCTGGAGTACTGCATCCAGATGTGGAGTCTCAGTACAGGAGAGACATGGACCTGTTGGAGCGCA  
TCCAGAGGAGGGCCACAAAATGATCCAAGGGATGGAACACCTCTCCTATGAGGACAGGCTGAGAGAGCTGGGGCTG  
TTCAGCCTGGAGAAGAGAAGGCTGTGAGGTGACCTGAGAGCGGCCTTTTCAGTATCTAAAGGGGAGCTACAGGAAAGA  
AGGGGACAGACTCTTTAGCAGGGTCTGTGGTGATAGAACAAGGGGAAATGGTTTTCAAGCTTAAAGAGGGTAGATTTA  
GGTTGGATATAAGGAAAAAGTCTTTTACAGTGAGGGTGGTGAGGCACTGGAACAGGTTGCCAGAGATGTGGTTGAT  
GCC

>CR1-D

AACCGTATCCTGGGCTGCATCAAAAAGAAGCGTGGCCAGCAGGTCGAGGGAGGTGATCCTGCCCTCTACTCTGCGCT  
GGTGAGGCCTCACCTGGAGTACTGCATCCAGATGTGGAGTCTCAGTACAGGAGAGACATGGACCTGTTGGAGCGCA  
TCCAGAGGAGGGCCACAAAATGATCCAAGGGATGGAACACCTCTCCTATGAGGACAGGCTGAGAGAGCTGGGGCTG  
TTCAGCCTGGAGAAGAGAAGGCTCCGAGGTGACCTGATAGCGGCCTTTTCAGTATCTAAAGGGGAGCTACAGGAAAGA  
AGGGGACAGACTCTTTAGCAGGGTCTGTGGTGATAGAACAAGGGGAAATGGTTTTCAAGCTTAAAGAGGGTAGATTTA  
GGTTAGATATAAGGAAAAAGTCTTTTACAGTGAGGGTGGTGAGGCACTGGAACAGGTTGCCAGAGATGTGGTTGAT  
GCC

>CR1-D2\_2

AACCGTATCCTGGGCTGCATCAAAAAGAAGCGTGGCCAGCAGGTTGAGGGAGGTGATCCTGCCCTCTACTCTGTGCT  
GGTGAGACCTCACCTGGAGTACTGCATCCAGATGTGGAGTCTCAGTACAGGAGAGACATGGACCTGTTGGAGCGCA  
TCCAGAGGAGGGCCACAAAATGATCCAAGGGATGGAACACCTCTCCTATGAGGACAGGCTGAGAGAGCTGGGGCTG  
TTCAGCCTGGAGAAGAGAAGGCTCTGGGGAGACCTGATAGCGGCCTTTTCAGTATCTAAAGGGGGCTATAAGAAAGA  
AGGGGACAGACTCTTTAGCAGGGTCTGTTGTGATAGGACAAGGGGAAATGGTTTTCAAATAAAAGAGGGGAGATTTA  
GATTGGATATAAGGAAGAAGTTTTTTACAATAAGGGTGGTGAGGCACTGGAACAGGTTGCCAGAGATGTGGTTGAT  
GCC

>CR1-C4

AACAGTATCCTGGGCTGCATCAAAAAGAGGGGTGGCCAGCAGGGAGAGGGAGGTGATTGTCCCCCTCTACTCTGCCCT  
TGTGAGGCCCCATCTGGAGTACTGTGTCCAGGCCTGGGGCCCCCAGCACAGGAAGGATGTGGAGCTGTTGGAGTGGG  
TCCAGAGGAGGGCCACGAAGATGATCAGAGGGCTGGAGCACCTCTCCTATGAAGAAAGGTTGAGGGAGCTGGGCTTG  
TTCAGCTTGGAGAAGAGAAGGCTCTGGGGAGACCTCATTGCGGCCTTCCAGTACTTGAAGGGAGCTTATAAGCAGGA  
GGGAGACTGACTTTTTACATGGTCTGATAGTGATAGGACAAGGGGGAATGGCTTTAACTAAAAGAGGGGAGATTTA  
GGTTAGATGTTAGGAAGAAATTTCTTTACTCAGAGGGTGGTGAGGCACTGGCACAGGCTGCCAGAGAAGCTGTGGAT  
GCC

>CR1-C4\_3

AACAGTATCCTGGGCTGCATCAAAAAGAGGGGTGGCCAGCAGGGAGAGGGAGGTGATTGTCCCCCTCTACTCTGCCCT  
TGTGAGGCCCCATCTGGAGTACTGCATCCAGGCCTGGGGCCCCCAGCACAGGAAGGATGTGGAGCTGTTGGAGTGGG  
TCCAGAGGAGGGCCACAAAGATGATCAGAGGGCTGGAGCACCTCTCCTATGAAGAAAGGCTGAGGGAGCTGGGCTTG  
TTCAGCTTGGAGAAGAGAAGGCTCTGGGGAGACCTCATTGCGGCCTTCCAGTACTTGAAGGGAGCTTATAAGCAGGA  
GGGGGACTGACTTTTTACATGGTCTGATAGTGATAGGACAAGGGGGAATGGCTTTAACTAAAAGAGGGGAGATTTA  
GGTTAGATGTTAGGAAGAAATTTCTTTACTCAGAGGGTGGTGAGGCACTGGCACAGGCTGCCAGAGAAGCTGTGGAT  
GCC

>CR1-C4\_4

AACAGTATCCTGGGCTGCATCAAAAAGAGGGGTGGCCAGCAGGGAGAGGGAGGTGATTGTCCCCCTCTACTCTGCCCT  
TGTGAGGCCCCATCTGGAGTACTGCATCCAGGCCTGGGGCCCCCAGCACAGGAAGGATGTGGAGCTGTTGGAGCGGG  
TCCAGAGGAGGGCCACAAAGATGATCAGAGGGCTGGAGCACCTCTCCTATGAAGAAAGGTTGAGGGAGCTGGGCTTG

TTCAGCCTGGAGAAGAGAAGGCTCCAGGGAGACCTCATTGTGGCCTTCCAGTACTTAAAGGGAGCTTATAAACAGGA  
GGGAGACTGACTTTTTTACATGGTCTGATAGTGATAGGACAAGGGGGAATGGTTTTTAACTAAAAGAGGGGAGATTTA  
GATTAGATGTTAGGAGGAAATTTTTTACTCAGAGGGTGGTGGGCACTGGAACAGGTTGCCAGAGAAGCTGTGGAT  
GCC

>CR1-C4\_5

AACAGTATCCTGGGCTGCATCAAAAGAGGGGTGGCCAGCAGGGAGAGGGAGGTGATTGTCCCCCTCTGCTCTGCCCT  
TGTGAGGCCCCATCTGGAGTACTGCATCCAGGCCTGGGGCCCCCAGCACAAAGAAAGATGTGGAGCTGTTGGAGTGGG  
TCCAGAGGAGGGCCACAAAGATGATCAGAGGGCTGGAGCACCTCTCCTATGAAGAAAGGCTGAGGGAGCTGGGCTTG  
TTCAGCCTGGAGAAGAGAAGGCTCTGGGGAGACCTCATTGTGGCCTTCCAGTACTTAAAGGGAGCTTATAAACAGGA  
GGGAGACTGACTTTTTTACATGGTCTGATAGTGATAGGACAAGGGGGAATGGTTTTTAACTAAAAGAGGGGAGATTTA  
GATTAGATGTTAGGAGGAAATCTTTACTCAGAGGGTGGTGGGCACTGGCACAGGCTGCCAGAGAAGCTGTGGAT  
GCC

>CR1-C2

AACTGTGTTCTGGGCTGCATTA AAAAAGGGGTGGCCAGCAGGGAGAGGGAGGTGATTGTCCCCCTCTACTCAGCTCT  
TGTGAGGCCCCATCTGGAGTACTGCGTCCAGGCCTGGGGCCCCCAGCACAAAGAAAGACGTGGAGCTCTTGGAACGGG  
TCCAGAGGAGGGCCACTAAGATGATCAGAGGGCTGGAGCACCTCTCCTATGAGGAAAGGTTGAGGGAACCTGGGCTTG  
TTTAGCTTGGAGAAGAGAAGGCTCCGGGGAGACCTCATTGTGGCCTTCCAGTACTTGAAGGGAGCATATAAACAGGA  
GGGGGAATGGCTGTTTTACAAGGGTGGATAGTGATAGGACAAGGGGGAATGGTTTTTAACTGAGACAGGGGAGGTTTTA  
GGTTAGATATTAGGAGGAAGTTTTTACACAGAGGGTGGTGACGCACTGGAACAGGTTGCCAAGGAGGTTGTGGAT  
GCC

>CR1-C\_2

AACTGTGTTCTGGGCTGCATTA AAAAAGGGGTGGCCAGCAGGGAGAGGGAGGTGATTGTCCCCCTCTACTCAGCTCT  
TGTGAGGCCCCATCTGGAGTACTGCGTCCAGGCCTGGGGCCCCCAGTACAGGAAGGACGTGGAGCTCTTGGAACGGG  
TCCAGAGGAGGGCCACTAAGATGATCAGAGGGCTGGAGCACCTCTCCTATGAGGAAAGGTTGAGGGAACCTGGGCTTG  
TTTAGCTTGGAGAAGAGAAGGCTCCGGGGAGACCTCATTGTGGCCTTCCAGTACTTGAAGGGAGCATATAAACAGGA  
GGGGGAATGGCTGTTTTACGAGGGTGGATAGTGATAGGACAAGGGGGAATGGTTTTTAACTGAGACAGGGGAGGTTTTA  
GGTTAGATATTAGGAGGAAGTTTTTACACAGAGGGTGGTGACACACTGGAACAGGTTGCCAAGGAGGTTGTGGAT  
GCC

>CR1-D2\_3

AACCGTATCCTGGGCTGCATCAAAAGAAGCGTGGCCAGCAGGTGCGAGGGAGGTGATCCTGCCCTCTACTCTGCGCT  
GGTGAGACCTCACCTGGAGTACTGCATCCAGATGTGGAGTCTCAGTACAGGAGAGACATGGACCTGTTGGAGCGCA  
TCCAGAGGAGGGCCACAAAATGATCCAAGGGATGGAACACCTCCCCTATGAGGACAGGCTGAGAGAGCTGGGGCTG  
TTCAGCCTGGAGAAGAGAAGGCTCTGGGGAGACCTGATAGCAGCCTTTTCAGTATCTAAAGGGGGCTATAAGAAAGA  
AGGGGACAGACTCTTTAGCAGGGTCTGTTGTGATAGGACAAGGGGAAATGGTTTTCAAATAAAAGAGGGGAGATTTA  
GATTGGATATAAGGAAGAAGTTTTTTACAATAAGGGTGGTGGGCACTGGAACAGGTTGCCAGAGAGGTGGTGGAT  
GCC

>CR1-X

AATGGCATCCTGGCTTGTATCAGAAACAGTGTGGCCAGCAGGAACAGGGAAGTAATTGTCCCCCTGTACTCAGCACT  
GGTGAGGCCCGCACCTCGAGTACTGTGTCCAGTTTTGGGCCCTCACTGTAAGAAAGACATCGAGGCCCTGGAGCGTG  
TCCAGAGAAGGGCAACAAAGCTGGTGGGGGTCTGGAGCACAGGCCTTATGAGGAGCGGCTGAAGGAGCTGGGATTG  
TTCAGTCTGGAGAAGAGGAGGCTCAGGGGAGACCTTATTGCTCTCTATAACTACCTGAAGGGAGGTTGTAGTGAGCT  
GGGGGTGAGCCTCTTCTCTCGTGTGACTAGTGATAGGACTAGAGGGAATGGCTTCAAGCTGCGCCAGGGAAGGTTCA  
GGCTGGACGTTAGGAAATACTACTTCTCTGAAAGGGTGGTGGGCACTGGAATGGGCTGCCAGAGAGGTGGTGGAG  
TCA

>CR1-H\_3

AATGGCATCCTGGCTTGTATCAGAAATAGTGTGGCCAGCAGGAACAGGGAAGTAATTGTCCCCCTGTACTCAGCACT  
GGTGAGGCCCGCACCTCGAGTACTGTGTCCAGTTTTGGGCCCTCACTGTAAGAAAGACATCGAGGCCCTGGAGCGTG  
TCCAGAGGAGGGCAACAAAGCTGGTGGGGGTCTGGAGCACAGGCCTTATGAGGAGCGGCTGAAGGAGCTGGGATTG  
TTCAGTCTAGAGAAGAGGAGGCTCAGGGGAGACCTTATTGCTCTCTATAACTACCTGAAGGGAGGTTGTAGTGAGCT  
GGGGGTGAGCCTCTTCTCTCGTGTGACTAGTGATAGGACTAGAGGGAATGGCTTCAAGCTGCGCCAGGGAAGGTTCA  
GGCTGGACGTTAGGAAATACTACTTCTCTGAAAGGGTGGTGGGCACTGGAATGGGCTGCCAGAGAGGTGGTGGAG  
TCA

>CR1-H

AATGGCATCCTGGCTTGTATCAGAAATAGTGTGGCCAGCAGGAACAGGGAAGTAATTGTCCCCCTGTACTCAGCACT  
GGTGAGGCCCGCACCTCGAGTACTGTGTCCAGTTTTGGGCCCTCACTGTAAGAAAGACATCGAGGCCCTGGAGCGTG  
TCCAGAGGAGGGCAACAAAGCTGGTGGGGGTCTGGAGCACAGGCCTTATGAGGAGCGGCTGAAGGAGCTGGGATTG  
TTCAGTCTAGAGAAGAGGAGGCTCAGGGGAGACCTTATTGCTCTCTATAACTACCTGAAGGGAGGTTGTAGTGAGCT



GGGGGTCAGCCTCTTCTCTCGTGTGACTAGTGATAGGACTAGAGGGAATGGCTTCAAGCTGCGCCAGGGAAGATTCA  
GGCTGGACGTTAGGAAATACTACTTCTCTGAAAGGGTGGTCAGGCACTGGAATGGGCTGCCAGAGAGGTGGTGGAG  
TCA

>CR1-X\_4

AATGGCATCCTGGCTTGTATCAGAAATAGTGTTGCCAGCAGGAGCAGGGAGGTGATCATCCCCCTGTACTCAGCTCT  
GGTGAGGCTGCACCTTGAGTACTGTGTTTTCAGTTTTGGGCCCTCACTACAAGAAAGACATTGAGGCCCTGGAGCATG  
TCCAGAGAAGGGCAACAAAGCTGGTGAGGGGTCTGGAGCACAAGTCTTATGAGGAGCGGCTGAGGGAACCTGGGATTG  
TTTAGTCTGGAGAAGAGGAGGCTCAGGGGAGACCTTATTGCTCTCTACAACCTACCTGAAAGGAGGTTGTGGTGGAGT  
GGGGGTCAGCCTCTTCTCCCATGTAAGTACTAGTGATAGGACTAGAGGGAATGGCCTCAAGTTGCACCAGGGGAGGTTCA  
GGTTGGATATTAGGAAAAATTTCTTCTCTGAAAGAGTGGTCAGGCACTGGAACAGGCTGCCAGGGAGGTGGTGGAG  
TCA

>CR1-X\_5

AATGGCATCCTGGCTTGTATCAGAAATAGTGTTGCCAGCAGGAGCAGGGAAGTATCATCCCTCTGTACTCAGCACT  
GGTGAGGCTGCACCTTGAGTACTGTGTTTTCAGTTTTGGGCCCTCACTACAAGAAAGACATTGAGGCCCTGGAGCGTG  
TCCAGAGAAGGGCAACGAAGCTGGTGAGGGGTCTGGAGCACAAGTCTTATGAGGAGCGGCTGAGGGAGCTGGGATTG  
TTTAGTCTGGAGAAGAGGAGGCTCAGGGGAGACCTTATTGCTCTCTACAACCTACCTGAAAGGAGGTTGTGGTGGAGT  
GGGGGTCAGCCTCTTCTCCCATGTAAGTACTAGCAATAGGACTAGAGGGAATGGCCTCAAGTTGCACCAGGGGAGATTCA  
GGTTGGATGTTAGGAAATACTTCTTCTCTGAGAGAGTGGTCAGGCACTGGAATGGGCTGCCAGGGAGGTGGTGGAG  
TCA

>CR1-X\_6

AATGGCATCCTGGCTTGTATCAGAAATAGTGTTGCCAGCAGGAGCAGGGAAGTATCATCCCTCTGTACTCAGCACT  
GGTGAGGCCGCACCTTGAGTACTGTGTTTTCAGTTTTGGGCCCTCACTACAAGAAAGACATTGAGGCCCTGGAGCGTG  
TCCAGAGAAGGGCAACAAAGCTGGTGAGGGGTCTGGAGCACAAGTCTTATGAGGAGCGGCTGAGGGAACCTGGGATTG  
TTTAGTCTGGAGAAGAGGAGGCTCAGGGGAGACCTTATTGCTCTCTACAACCTACCTGAAAGGAGGTTGTGGTGGAGT  
GGGGGTCAGCCTCTTCTCCCATGTAAGTACTAGCGATAGGACTAGAGGGAATGGCCTCAAGTTGCACCAGGGGAGATTCA  
GGTTGGATGTTAGGAAAAATTTCTTCTCTGAAAGAGTGGTCAGGCGCTGGAATGGGCTGCCAGGGAGGTGGTGGAG  
TCA

>CR1-X2\_3

AATGGCATCCTGGCTTGTATCAGGAATGGTGTGGTGAGCAGGACTAGGGAAGTAATCCTGCCCTGTACTCGGCACT  
GGTGAGGCCTCACCTCGAGTACTGTGTTTTCAGTTTTGGGCACCTCAGTACAGAAAGGACATTGAGGTGCTGGAGCAGG  
TCCAAAGAAGGGCAACAAGGCTTGTGAAGGGCTTGGAGAATATGCCCTATGAGGAGCGACTGAAGGAACCTGGGGCTG  
TTTAGTCTGGGGAAGAGGAGGCTGAGGGGAGACCTTATTGCTCTCTTCCAATATCTGAAAGGTGCTTACAGCGAGAG  
CGGGGTTGGTCTCTTCTCACTGGTGACAGGTGACAGGATGAGGGGAAATGGCCTCAAGTTGCGCCAGGGTAAGTTTA  
GGTTGGATATCAGGAAAAACTTCTTTACAGAAAGGGTGTAAAGCACTGGAATAGGCTCCCCAGGGAGGTGGTTGAG  
TCA

>CR1-X2\_4

AATGGCATCCTGGCTTGTATCAGGAATGGTGTGGTGAGCAGGACTAGGGAAGTAATCCTGCCCTGTACTCGGCATT  
GGTGAGGCCTCACCTCGAGTACTGTGTTTTCAGTTTTGGGCACCTCAGTACAGAAAGGACATTGAGGTGCTGGAGCAGG  
TCCAAAGAAGGGCAACAAGGCTTGTGAAGGGCTTGGAGAATATGCCCTATGAGGAGAGACTGAAGGAACCTGGGGCTG  
TTTAGTCTGGGGAAGAGGAGGCTGAGGGGAGACCTTATTGCTCTCTTCCAATATCTGAAAGGTGCTTACAGCGAGAG  
CGGGGTTGGTCTCTTCTCACTGGTGACAGGTGACAGGACGAGGGGAAATGGCCTCAAGTTGCGCCAGGGTAAGTTTA  
GGTTGGATATCAGGAAAAACTTCTTTACAGAAAGGGTGTAAAGCACTGGAATAGGCTCCCCAGGGAGGTGGTTGAG  
TCA

>CR1-X2

AATGGCATCCTGGCTTGTATCAGGAATGGTGTGGTGAGCAGGACTAGGGAAGTATCCTGCCCTGTACTCGGCATT  
GGTGAGGCCTCACCTCGAGTACTGTGTTTTCAGTTTTGGGCACCTCAGTACAGAAAGGACATTGAGGTGCTGGAGCAGG  
TCCAAAGAAGGGCAACAAGGCTTGTGAAGGGCTTGGAGAATATGCCCTATGAGGAGAGACTGAAGGAACCTGGGGCTG  
TTTAGTCTGGGGAAGAGGAGGCTGAGGGGAGACCTTATTGCTCTCTTCCAATATCTGAAAGGTGCTTACAGCGAGAG  
CGGGGTTGGTCTCTTCTCACTGGTGACAGGTGACAGGACGAGGGGAAATGGCCTCAAGTTGCACCAGGGTAAGTTTA  
GGTTGGATATCAGGAAAAACTTCTTTACAGAAAGGGTGTAAAGCACTGGAATAGGCTCCCCAGGGAGGTGGTTGAG  
TCA

>CR1-X\_7

AATGGCATCCTGGCTTGTATCAGAAATAGTGCCAGCCAGCAGGACCAGGGAGGTGATCGTCCCTCTGTACTCAGCACT  
GGTGAGGCTGCACCTCGAGTACTGTGTTTTCAGTTTTGGGCCCTCACTACAAGAAAGACATTGAGGCCCTGGAGCGTG  
TCCAGAGAAGGGCAACAAAGCTGGTGAGGGGTCTGGAGCACAAGTCTTATGGGGAGTGGCTGAGGGAACCTGGGATTG  
TTCAGTCTGGAGAAGAGGAGGCTCAGGGGAGACCTCATTGCTCTCTACAACCTACCTGAAAGGAGGTTGTGGTGGAGT  
GGGGGTTAGCCTTTTTCTCCAGGGTAACAGCAATAGGACAAGAGGTAATGGCCTCAAGTTGTGCCAGGGGAGGTTCA

GGTTGGATATTAGGAAAAATTTCTTCTCAGAAAGAGTGGTCAGGCATTGGAACAGGCTGCCAGGGAGGTGGTGGAG  
TCA

>CR1-F2\_2

AATGGTATCCTGGGGTGCATTAAAAAGAGCGTGGCCAGCAGGTTCGAGGGAGGTGATCCTCCCCCTCTACTCTGCCCT  
GGTGAGGCCACATTTAGAATACTGTGTCCAGTTCTGGGCTCCCCAGTTCAAAAAAGACAGGGATCTCCTAGAAGGAG  
TCCAGCAGAGGGGCCACAAAGATGATAAAGGGCCTGGAGCATCTCCCGTATGAGGAAAGGCTGAGTAACCTGGGTCTG  
TTCAGCCTGGGGAAAAGAAGACTGAGAGGGGATCTGATTAATGTTTATAAATATCTAAAGGGAGGTGGGAGGCAAT  
GGATGAGGCCAGGCTCTTCTCAGTGGTGTGTAGTGATAGGACAAGGAGCAATGGCCTAAAACCTTGAACATAGGAAGT  
TCCATACAAACATGTGGAAGAACTTCTTTACAGTAAGGGTGACGGGAGCACTGGAACAGGTTGCCAGAGAGGTTGTG  
GAGTCT

>CR1-F2\_3

AATGGTATCCTGGGGTGCATTAAAAAGAGCGTGGCCAGCAGGTTCGAGGGAGGTGATCCTCCCCCTCTACTCTGCCCT  
GGTGAGGCCACATTTAGAATACTGTGTCCAGTTCTGGGCTCCCCAGTTCAAAAAAGACAGGGATCTCCTAGAAGGAG  
TCCAGCAGAGGGGCCACAAAGATGATAAAGGGCCTGGAGCATCTCCCATATGAGGAAAGGCTGAGTAACCTGGGTCTG  
TTCAGCCTGGGGAAAAGAAGACTGAGGGGGGATCTGATTAATGTTTATAAATATCTAAAGGGAGGTGGGAGGCAAT  
GGATGAGGCCAGGCTCTTCTCAGTGGTGTGTAGCGATAGGACAAGGAGTAATGGCCTAAAACCTTGAACATAGGAAGT  
TCCATACAAACATGCAGAAGAACTTCTTTACGTAAGGGTGATGGAGCACTGGAACAGGTTGCCAGAGAGGTTGTG  
GAGTCT

>CR1-X\_8

AATGGCATCCTGGCTTGTATCAGAAATAGTGCAGCCAGCAGGAGCAGGGAGGTGATCGTCCCTCTGTACTCAGCACT  
GGTGAGGCCCGCACCTCGAGTACTGTGTTTCAAGTTTGGGCCCCCTCACTACAAGAAAGACATTGAGGCCCTGGAGCGTG  
TCCAGAGAAGGGCAACGAAGCTGTGAGGGGTCTGGAGCACAAGTCTTATGGGGAGCGGCTGAGGGAACCTGGGATTGT  
TCAGTCTGGAGAAGAGGAGGCTCAGGGGAGACCTTATTGCTCTCTACAACCTACCTGAAAGGAGGTTGTGGTGAGGTG  
GGGGTTGGCCTCTTCTCCCAGGTAACAGTGATAGGATGAGAGGTAATGGCCTCAAGTTGTGCCAGGGGAGGTTTCAAG  
TTGGATATTAGGAAAAATTTCTTCTCAGAAAGAGTGGTGGAGCATTGGAACAGGCTGCCAGGGAGGTGGTGGAGTC  
A

>CR1-X1\_2

AATGCCATCCTGGCCTGCATTAGAATAAGTGTGGCCAGCAGGAGCAGGGAGGTAATCATCCCCCTGTACTCAGCACT  
GGTGAGGCCCGCACCTCGAGTATTGTGTTTCAAGTTTGGGCCCCCTCACTACAAGAAAGACATTGAGGCCCTGGAACGTG  
TCCAGAGAAGGGCAACAAAACCTGGTGAGGGGTCTGGAGCACAAGTCTTATGAGGAGCGGCTGAGGGAGCTGGGATTG  
TTTGTCTGGAGAAGAGGAGGCTCAGGGGAGACCTCATTGCACTCTACAACCTTCTGAAGGGAGGTTGTGATGAGGA  
GGGGTTTGGCCTCTTCTCCCAGGCAACAAAACAGGACCCGAGGAAATGGCCACAAGTTGTGCCAGAGGAGATTTAGAT  
TAGACATAAGGAAAAACTTTTTCTTCTCAGAGAGTGGTTCAGGCATGGAATGGCCTGCCAGGGAGGTGGTGGAGTTG  
>CR1-Y4\_2

AACTGTACCCTGGGGTGCATCAGGCCAGCACTGCCAGCTGGTTCGAGGGAAGGGATTGTCCCCTCTGCTCTGCACT  
GGTGCAGCCTCACCTCGAGCACTGTGTGCAGTTTTGGGTGCCACAATATAAGAAGGACATAAAAATATTAGAGAGCG  
TCCAAAGGAGGGCTACAAAGATGGTGAAGGGTCTAGAGGGCAAGATGTATGAGGAGCGGCTGAGGTCCCTTGGTTTTG  
TTCAGCCCAGAGCAGAGGAGGCTGAGGGGAGGCCTCATGGCAGCCTACAGCTTCTTAAAGGGAGCAGGAGGAGCGGG  
ACTGATCTTTTTCTTTTTGGTGACAGTGACAGGACCCGAGGGAACGGCATGGAGCTGTGTGAGGGGAGGGTTCAGGTTG  
GGTGTAGGAAAAGGTTCTTACCAGAGGGTGGTTCAGGCCCTGGAACAGGCTCCCCAGGGCAGTGGTCAATGCC

>CR1-Y3

AACCGTACCCTGGGGTGCATCAGGCCAGCACTGCCAGCAGGGCGAGGGAAGGGTTGTCCCCTCTGCTCTGCGCT  
GTGCGGCCTCACCTCCAGCACTGGGTGCAGTTTTGGGTGCCACAATATAAGAAGGACATAAAAATATTAGAGAGCGT  
CCAAAGGAGGGCTACAAAGATGGTGAAGGGTCTGGAGGGCAAGATGTATGAGGAGCAGCTGAGGTCCCTGGGTTTTG  
TCAGCCCAGAGCAGAGGAGCTGAGGGGAGGCCTCATGGCGGCTGCAGCTCCTCACAGGGAGCGGAGGGGCAGCGCTG  
AGCTCTGCTCTCTGTGTGACAGCGACAGGGCCCCGAGGGAACGGCATGGAGCTGTGTGAGGGGAGGGCAGGTGGGG  
TTAGGGAAGGGTCTGCACCAGAGGGCTGTGGGCATGGAACAGGCTGCCAGGGCAGTGGGCACGGCC

>CR1-C\_3

AACTGTGTTCTGGGCTGCATTAAAAAAGGGGTGGCCAGCAGGGAGAGGGAGGTGATTGTCCCCCTCTACTCAGCTCT  
TGTGAGGCCCATCTGGAGTACTGCGTCCAGGCCTGGGGCCCCCAGTACAGGAAGGACGTGGAGCTCTTGGAGCGGG  
TCCAGAGGAGGGCCACTAAGATGATCAGAGGGCTGGAGCACCTCTCCTGTGAGGAAAGGTTGAGGGAACCTGGGCTTG  
TTTAGCTTGGAGAAGAGAAGGCTCCGGGGAGACCTCATTGTGGCCTTCCAGTACTTGAAGGGAGCATATAAACAGGA  
GGGGGAACGGCTGTTTTACGAGGGTGGATAGTGATAGGACAAGGGGAATGGTTTTAAACTGAGACAGGGGAGGTTTTA  
GGTTAGATATTAGGAGGAAGTTTTTTCACACAGAGGGTGGTGCAGCACTGGAACAGGTTGCCAAGGAGGTTGTGGAT  
GCC

>CR1-F0-T12

AATGGCATTCTGGGGTGCATTAAGAAGAGCGTGTCCAGCAGGTCGAGGGAGGTGATCCTCCCCCTCTACTCTGCCCT  
GGTAAGGCCTCATCTGGAGTACTGTGTCCAGTTCTGGGCTCCCCAGTACAAAAAAGACAGGGATCTCTTGGAAAGAG  
TCCAGCGGAGGGCCACAAAGATGGTGAAGGGCCTGGAGCATCTCCCCTATGAAGAAAGGCTAAGTGAAGTGGGTCTG  
TTTAGCCTTGAGAAAAGAAGACTGAGAGGGGACCTGATCCAGGTTTATAAATATCTGAGGTGTGGCGGCCATAGTGG  
TGAGGCCAGTCTCTTTTCAGTGGTACGTGGAGACAGGACGAGGGGAAACGGACATAAGCTGCAGCATAGGAAGTTTC  
GCACGAATGTGCGTAAGAACTTCTTCACGGTGAGGGTGACGGAGCACTGGAACAGGCTGCCCAGGGAGGTTGTGGAG  
TCT
